# Supplementary material
Source: Springer Nature journal article supplement (https://www.springermedizin.de/resource/supplementary/12885_2008_1101_MOESM5_ESM.pdf/9471116)

**a**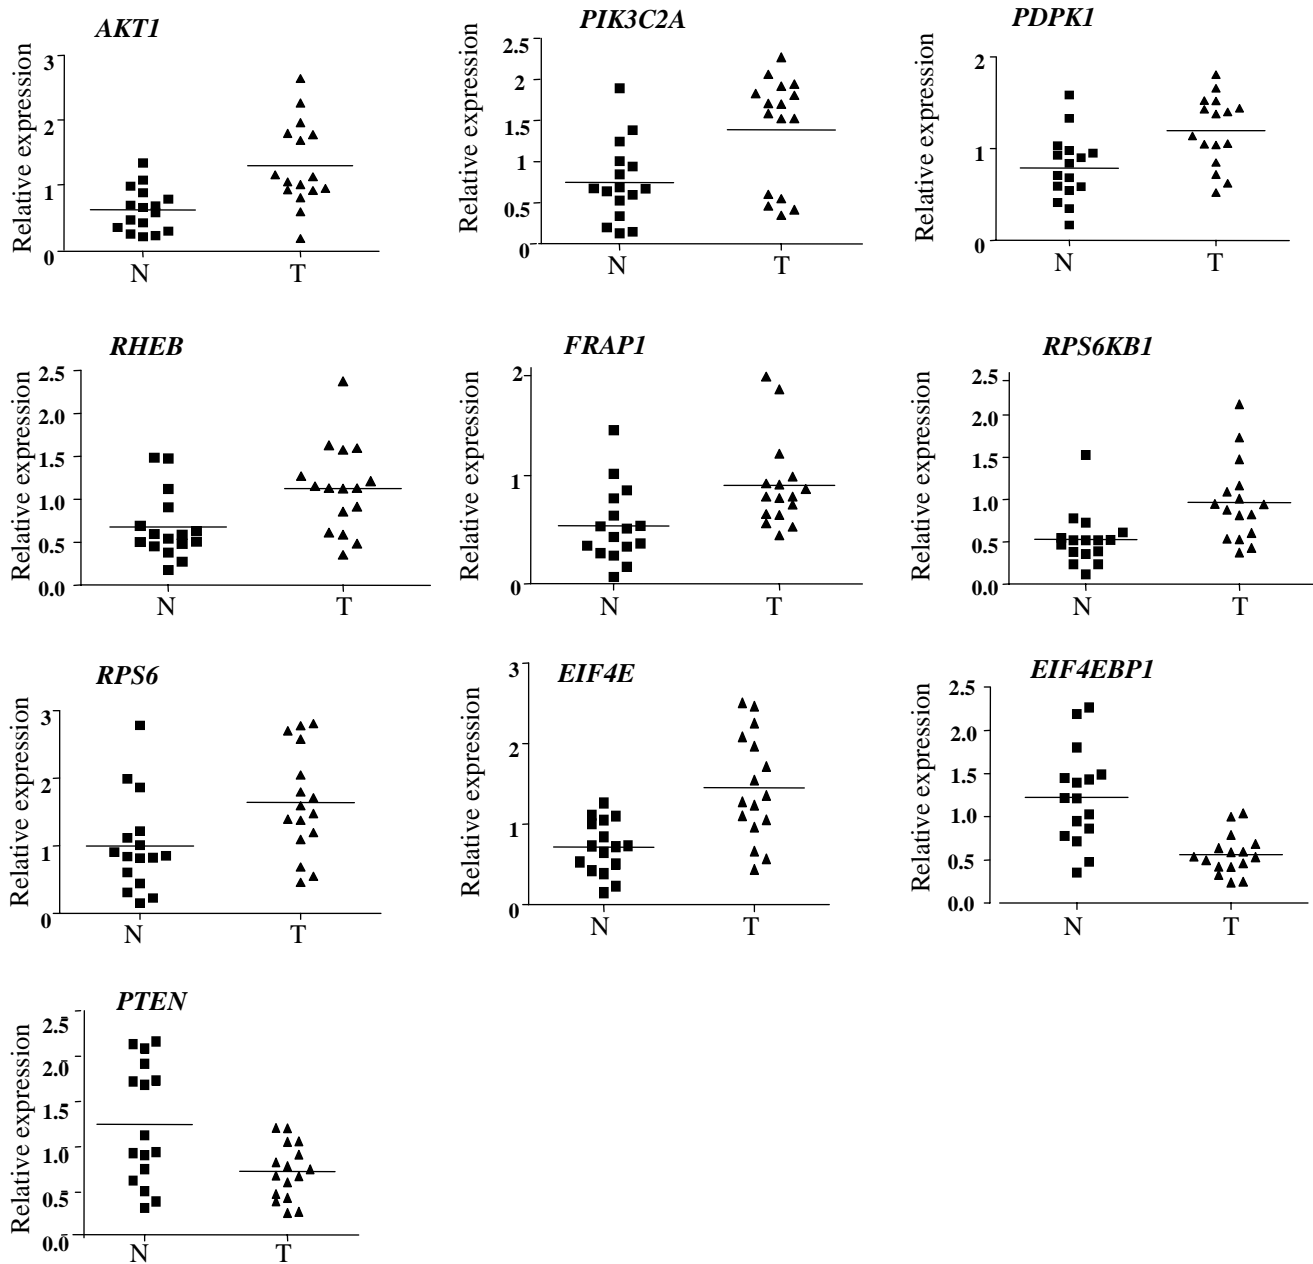**b**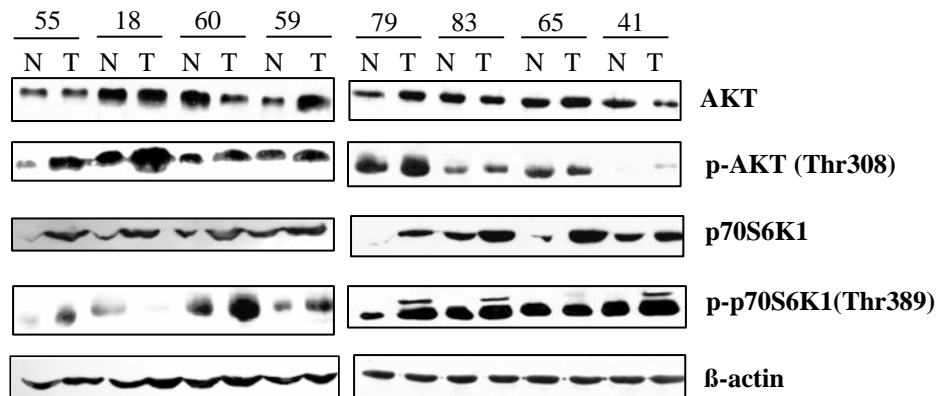

Supplement: MOESM5 [file 9471116]
